# Supplementary material for: An ultrasensitive and selective turn-off fluorescent nanoprobe for the detection of copper ions
Source: Royal Society of Chemistry journal article supplement (doi:10.1039/c5ay00766f), 2015-01-01
Supplement: c5ay00766f1.pdf [file c5ay00766f1.pdf]

## Supporting Information

### **An Ultrasensitive and Selective Turn-Off Fluorescent Nanoprobe for the Detection of Copper Ions**

M.RezaHormozi-Nezhad<sup>\*1,2</sup>, M. Taghipour

1) *Department of Chemistry, Sharif University of Technology, Tehran, 11155-9516, Iran*

2) *Institute for Nanoscience and Nanotechnology, Sharif University of Technology,*

*Tehran, P.O. Box 11365-9161, Iran*

\* Corresponding author at: Department of Chemistry, Sharif University of Technology

Tel.: +98 2166165337; Fax: +98 2166029165

E-mail addresses: [hormozi@sharif.edu](mailto:hormozi@sharif.edu)

In order to obtain the highest detection efficiency of the prepared FRET-based sensor, FITC concentration optimization was one of the parameters to be optimized. Therefore, the effect of FITC concentration was studied in the range of 0-1.75  $\mu\text{M}$  on the fluorescence intensity of AuNPs-FITC in the presence (A) and absence (B) of D-PC (Fig. S 1). The optimal concentration of FITC is crucial to saturate the surface of AuNPs, while remaining almost no free FITC in the solution. The results demonstrated that the fluorescence intensity rises drastically upon increase in concentration of FITC above 1.25  $\mu\text{M}$ . This can be ascribed to the presence of free FITC molecules more than what is required for the saturation of AuNPs. Additionally, the fluorescence intensity was quenched at concentrations below to the 1  $\mu\text{M}$ , indicating all of FITC molecules were loaded on AuNPs surface and perhaps there are some vacant spots on AuNPs surface. These free spots, later can be capped by D-PC without releasing any FITC molecule. Thus, the concentration of 1  $\mu\text{M}$  was chosen as the optimum concentration of FITC for next experiments.

Time was another parameter that was investigated for each step. Initially the time needed for formation of probe was studied. As shown in Fig. S 2 (B), after 5 min, the probe fluorescence is at lowest intensity and totally stable. Therefore, 5 min was chosen as the optimized time for next experiments. After addition of D-PC and copper complex solution to the probe solution, as shown in Fig S 2 (B), incubation time is only 25 min to reach the highest fluorescence intensity which means the highest release of FITC by D-PC. Then, 25 min was chosen as the optimized time for next experiments.

Table 1 shows a quick comparison between the current proposed method and two other methods [1-2].

**Legend of figures:**

**Figure S 1.**Effect of FITC on the fluorescence intensity in the presence of 1.5 nMAuNPs at pH=8. (A) At the absence of D-PA (Blank) and (B) In the presence of 8.5  $\mu$ M D-PA (Sample)

**Figure S 2.**Optimization of time. (A) Formation of AuNP-FITC probe at concentrations of 1.5 nM and 1  $\mu$ M, respectively and (B) Incubation time of probe and complex (D-PC and copper).

**Figure S 3.**Chemical structure of (A) D-Penicillamine, (B) Copper and D-penicillamine complex[3]

**Table S 1.** Comparison of the figures of merit between current method, ICP and AAS.

Figure S 1

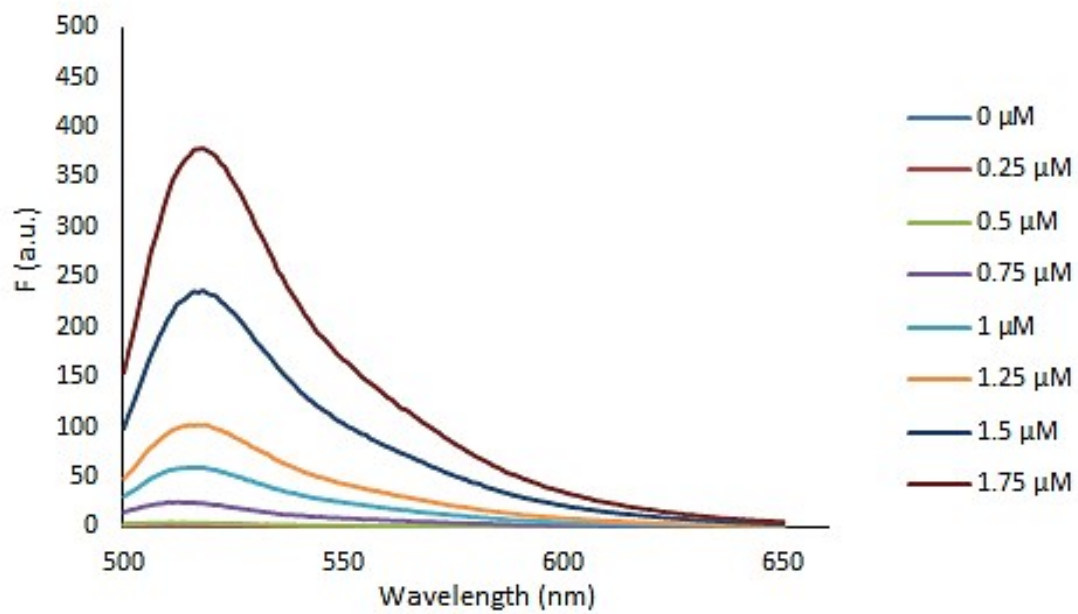

(A)

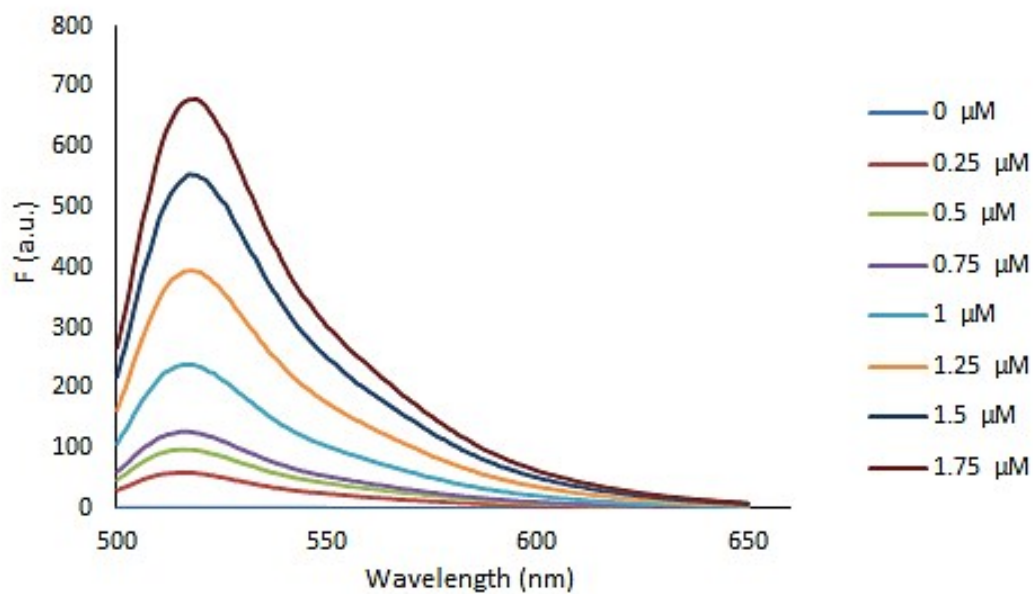

(B)

Figure S 2

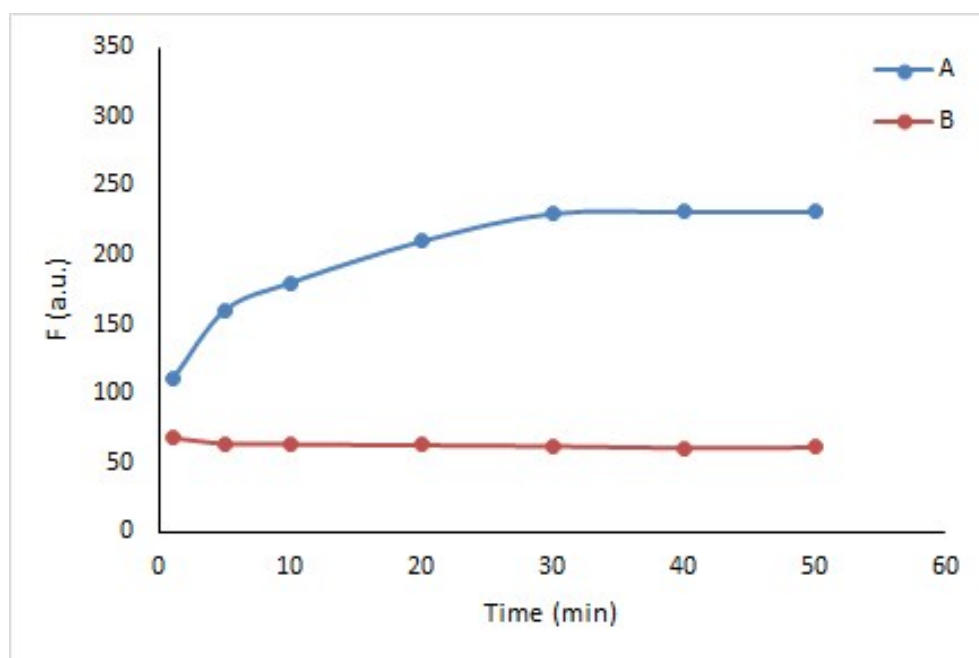

Figure S 3

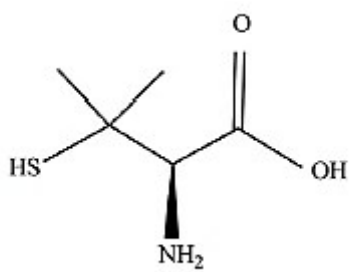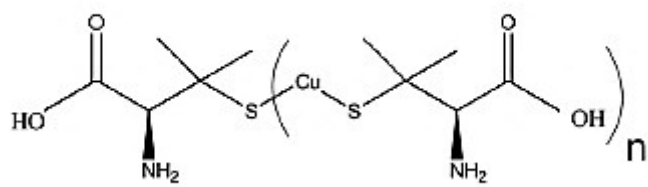

**Table 1**

| <b>Method</b>         | <b>LOD (nM)</b> | <b>LOQ (nM)</b> |
|-----------------------|-----------------|-----------------|
| <b>AAS (Flame)</b>    | 153.3           | 46.0            |
| <b>ICP</b>            | 26.7            | 8.0             |
| <b>Current Method</b> | 0.3             | 0.3             |

**Reference:**

- (1) D. M. Simpson, R. J. Beynon, D. H. L. Robertson, M. J. Loughran, S. Haywood, *Proteomics*, 2004, 4, 524–536.
- (2) M. Tuzen, *Microchem. J.*, 2003, 74, 289–297.
- (3) D. Evered, G. Lawrenson (Ed.), *Ciba Foundation Symposium 79—Biological Roles of Copper*, John Wiley & Sons, 1980, pp. 293-300.
- (4) A. Gergely, I. Sovago, *Bioinorg. Chem.* 1978, 9, 47–60.
